# Supplementary material
Source: PubMed Central journal article supplement (PMC2427237)
Supplement: mmc1.pdf [file mmc1.pdf]

## Supplemental Data

## Breakpoint Mapping and Array CGH in Translocations: Comparison of a Phenotypically Normal and an Abnormal Cohort

Julia Baptista, Catherine Mercer, Elena Prigmore, Susan M. Gribble, Nigel P. Carter, Viv Maloney, N. Simon Thomas, Patricia A. Jacobs, and John A. Crolla

Table S1. Phenotypic Details of 18 Clinically Normal Individuals

|                                          | Case 1A                                                                                                                                                                                                                                                                                                                | Case 1B                                                                                                                                                                                                                                                                                                     |
|------------------------------------------|------------------------------------------------------------------------------------------------------------------------------------------------------------------------------------------------------------------------------------------------------------------------------------------------------------------------|-------------------------------------------------------------------------------------------------------------------------------------------------------------------------------------------------------------------------------------------------------------------------------------------------------------|
| <b>Age at Assessment</b>                 | 53 years                                                                                                                                                                                                                                                                                                               | 35 years                                                                                                                                                                                                                                                                                                    |
| <b>Birth History</b>                     | No data                                                                                                                                                                                                                                                                                                                | Term                                                                                                                                                                                                                                                                                                        |
| <b>Medical History</b>                   | Intermittent bilateral hip and knee pain from age 6 years<br>Tonsillectomy in childhood<br>Left hip replacement age 52 years<br>Right hip replacement pending<br>Hypercholesterolaemia not requiring treatment<br>Allergic to aspirin<br>Teeth all lost secondary to trauma, e.g. rugby<br>“Soft” secondary dentition? | Perthe's disease, aged 8 years<br>Road traffic accident, aged 14—sustained metatarsal fracture<br>Age 20—onset of back pain and sciatica<br>Femoral osteotomy aged 25 years, leg length discrepancy of 2 cm diagnosed subsequently<br>Cluster of fainting episodes in late 20s, no causative diagnosis made |
| <b>Developmental History</b>             | No history of developmental delay<br>Academic achievement consistent for family                                                                                                                                                                                                                                        | No history of developmental delay<br>Academic achievement consistent for family                                                                                                                                                                                                                             |
| <b>Vision and Hearing</b>                | No hearing difficulties<br>Myopic since teenage years                                                                                                                                                                                                                                                                  | No hearing difficulties<br>No visual difficulties                                                                                                                                                                                                                                                           |
| <b>Height</b>                            | 173 cm                                                                                                                                                                                                                                                                                                                 | 162.5 cm                                                                                                                                                                                                                                                                                                    |
| <b>Percentile</b>                        | 25 <sup>th</sup> –50 <sup>th</sup>                                                                                                                                                                                                                                                                                     | 25 <sup>th</sup> –50 <sup>th</sup>                                                                                                                                                                                                                                                                          |
| <b>Est. Height from Parental Heights</b> | 179 cm                                                                                                                                                                                                                                                                                                                 | 169 cm                                                                                                                                                                                                                                                                                                      |
| <b>Occipital-Frontal Circumference</b>   | 57 cm                                                                                                                                                                                                                                                                                                                  | 56 cm                                                                                                                                                                                                                                                                                                       |
| <b>Percentile</b>                        | 25 <sup>th</sup> –50 <sup>th</sup>                                                                                                                                                                                                                                                                                     | 50 <sup>th</sup> –75 <sup>th</sup>                                                                                                                                                                                                                                                                          |
| <b>General Examination</b>               | Faded strawberry naevus, right thigh                                                                                                                                                                                                                                                                                   | Unremarkable                                                                                                                                                                                                                                                                                                |
| <b>Neurological Examination</b>          | Normal tone, power, and coordination in all four limbs                                                                                                                                                                                                                                                                 | Normal tone, power and coordination in all four limbs                                                                                                                                                                                                                                                       |
| <b>Dysmorphic Features</b>               | None                                                                                                                                                                                                                                                                                                                   | None                                                                                                                                                                                                                                                                                                        |
| <b>Family History</b>                    | None                                                                                                                                                                                                                                                                                                                   | None                                                                                                                                                                                                                                                                                                        |
|                                          | Case 1C                                                                                                                                                                                                                                                                                                                | Case 2A                                                                                                                                                                                                                                                                                                     |
| <b>Age at Assessment</b>                 | 62 years                                                                                                                                                                                                                                                                                                               | 46 years                                                                                                                                                                                                                                                                                                    |
| <b>Birth History</b>                     | No data                                                                                                                                                                                                                                                                                                                | No data                                                                                                                                                                                                                                                                                                     |
| <b>Medical History</b>                   | No health problems in childhood<br>Cervical polyps<br>Age 38, episode of collapse, secondary to anaemia. No overt loss and no cause found. No further episodes.<br>Arthritis in small joints                                                                                                                           | No health problems in childhood<br>Episode of epigastric pain aged 45 years, no diagnosis made but splenic cyst found incidentally<br>Prolactinoma diagnosed at 43 years, requiring medical treatment with Cabergoline                                                                                      |
| <b>Developmental History</b>             | No history of developmental delay<br>Academic achievement consistent for family                                                                                                                                                                                                                                        | No history of developmental delay<br>Academic achievement consistent for family                                                                                                                                                                                                                             |
| <b>Vision and Hearing</b>                | No hearing difficulties<br>Amblyopia and reduced vision in left eye                                                                                                                                                                                                                                                    | No hearing difficulties<br>No visual difficulties. Visual fields normal.                                                                                                                                                                                                                                    |
| <b>Height</b>                            | 160 cm                                                                                                                                                                                                                                                                                                                 | 160 cm                                                                                                                                                                                                                                                                                                      |
| <b>Percentile</b>                        | 25 <sup>th</sup> –50 <sup>th</sup>                                                                                                                                                                                                                                                                                     | 25 <sup>th</sup> –50 <sup>th</sup>                                                                                                                                                                                                                                                                          |
| <b>Est. Height from Parental Heights</b> | 163 cm                                                                                                                                                                                                                                                                                                                 | No data                                                                                                                                                                                                                                                                                                     |

|                                          |                                                                                                                                                                                                                                            |                                                                                                                                                                       |
|------------------------------------------|--------------------------------------------------------------------------------------------------------------------------------------------------------------------------------------------------------------------------------------------|-----------------------------------------------------------------------------------------------------------------------------------------------------------------------|
| <b>Occipital-Frontal Circumference</b>   | 57 cm                                                                                                                                                                                                                                      | 55 cm                                                                                                                                                                 |
| <b>Percentile</b>                        | 75 <sup>th</sup> –91 <sup>st</sup>                                                                                                                                                                                                         | 25 <sup>th</sup> –50 <sup>th</sup>                                                                                                                                    |
| <b>General Examination</b>               | Unremarkable                                                                                                                                                                                                                               | Unremarkable                                                                                                                                                          |
| <b>Neurological examination</b>          | Normal tone, power and coordination in all four limbs                                                                                                                                                                                      | Normal tone, power and coordination in all four limbs                                                                                                                 |
| <b>Dysmorphic Features</b>               | None                                                                                                                                                                                                                                       | None                                                                                                                                                                  |
| <b>Family History</b>                    | None                                                                                                                                                                                                                                       | None                                                                                                                                                                  |
| <hr/>                                    |                                                                                                                                                                                                                                            |                                                                                                                                                                       |
|                                          | <b>Case 2B</b>                                                                                                                                                                                                                             | <b>Case 2C</b>                                                                                                                                                        |
| <b>Age at Assessment</b>                 | 35 years                                                                                                                                                                                                                                   | 40 years                                                                                                                                                              |
| <b>Birth History</b>                     | Term                                                                                                                                                                                                                                       | No data                                                                                                                                                               |
| <b>Medical History</b>                   | Nasal polyps removed aged 12 years<br>Unilateral oophrectomy due to ovarian cyst, aged 21 years<br>Recurrent knee dislocations, arthroscopy aged 22 years.<br>×1 miscarriage, ×1 TOP for multiple fetal anomalies, further ×6 miscarriages | Tonsillectomy aged 6 years<br>No other significant history in childhood<br>Single episode of chest pain during coitus. No cause found; diagnosed as musculo-skeletal  |
| <b>Developmental History</b>             | No history of developmental delay<br>Developed speech aged 3 years<br>Academic achievement consistent for family                                                                                                                           | No history of developmental delay<br>Slow learning to read, educated in special needs class until age 10 years<br>Progress then rapid, completed university education |
| <b>Vision and Hearing</b>                | No hearing difficulties<br>Borderline hypermetropia                                                                                                                                                                                        | No hearing difficulties<br>No visual difficulties                                                                                                                     |
| <b>Height</b>                            | 150 cm                                                                                                                                                                                                                                     | 170 cm                                                                                                                                                                |
| <b>Percentile</b>                        | 0.4 <sup>th</sup> –2 <sup>nd</sup>                                                                                                                                                                                                         | 9 <sup>th</sup> –25 <sup>th</sup>                                                                                                                                     |
| <b>Est. Height from Parental Heights</b> | 158 cm                                                                                                                                                                                                                                     | 167.5 cm                                                                                                                                                              |
| <b>Occipital-Frontal Circumference</b>   | 51.5 cm                                                                                                                                                                                                                                    | 57 cm                                                                                                                                                                 |
| <b>Percentile</b>                        | < 0.4 <sup>th</sup>                                                                                                                                                                                                                        | 25 <sup>th</sup> –50 <sup>th</sup>                                                                                                                                    |
| <b>General Examination</b>               | Dental crowding, gum hypertrophy and gum inflammation                                                                                                                                                                                      | Single large naevus on right thigh<br>No other skin markings                                                                                                          |
| <b>Neurological examination</b>          | Mild intention tremor in both hands<br>Mildly impaired balance on heel-to-toe walking                                                                                                                                                      | Normal tone, power and coordination in all four limbs                                                                                                                 |
| <b>Dysmorphic Features</b>               | High arched palate                                                                                                                                                                                                                         | None                                                                                                                                                                  |
| <b>Family History</b>                    | Daughter with same translocation, developmentally normal<br>Single palmar crease                                                                                                                                                           | None                                                                                                                                                                  |
| <hr/>                                    |                                                                                                                                                                                                                                            |                                                                                                                                                                       |
|                                          | <b>Case 2D</b>                                                                                                                                                                                                                             | <b>Case 2E</b>                                                                                                                                                        |
| <b>Age at Assessment</b>                 | 55 years                                                                                                                                                                                                                                   | 29 years                                                                                                                                                              |
| <b>Birth History</b>                     | No data                                                                                                                                                                                                                                    | No data                                                                                                                                                               |
| <b>Medical History</b>                   | Recurrent tonsillitis<br>Hepatitis A aged 25 years<br>Cervical intraepithelia neoplasia, treated by colposcopy and ablation<br>×3 miscarriages<br>Pneumonia aged 44 years                                                                  | Molar pregnancy aged 23 years, presented at 6 weeks gestation.<br>×3 miscarriages                                                                                     |
| <b>Developmental History</b>             | No history of developmental delay<br>Slow learning to read, possibly dyslexic<br>Eventual academic achievement consistent for family                                                                                                       | No history of developmental delay<br>Walked at less than 1 year                                                                                                       |
| <b>Vision and Hearing</b>                | No hearing difficulties<br>Myopic                                                                                                                                                                                                          | No hearing difficulties<br>No visual difficulties                                                                                                                     |
| <b>Height</b>                            | 162.5 cm                                                                                                                                                                                                                                   | 155 cm                                                                                                                                                                |
| <b>Percentile</b>                        | 25 <sup>th</sup> –50 <sup>th</sup>                                                                                                                                                                                                         | 9 <sup>th</sup>                                                                                                                                                       |
| <b>Est. Height from Parental Heights</b> | 165 cm                                                                                                                                                                                                                                     | 159 cm                                                                                                                                                                |

*AJHG*, Volume 82

|                                          |                                                                                                                                                                                                                                        |                                                                                                                                                                                                                                                      |
|------------------------------------------|----------------------------------------------------------------------------------------------------------------------------------------------------------------------------------------------------------------------------------------|------------------------------------------------------------------------------------------------------------------------------------------------------------------------------------------------------------------------------------------------------|
| <b>Occipital-Frontal Circumference</b>   | 56 cm                                                                                                                                                                                                                                  | 55 cm                                                                                                                                                                                                                                                |
| <b>Percentile</b>                        | 50 <sup>th</sup> –75 <sup>th</sup>                                                                                                                                                                                                     | 25 <sup>th</sup> –50 <sup>th</sup>                                                                                                                                                                                                                   |
| <b>General Examination</b>               | Two small naevi on left upper arm                                                                                                                                                                                                      | Unremarkable                                                                                                                                                                                                                                         |
| <b>Neurological examination</b>          | Normal tone, power and coordination in all four limbs                                                                                                                                                                                  | Normal tone, power and coordination in all four limbs                                                                                                                                                                                                |
| <b>Dysmorphic Features</b>               | None                                                                                                                                                                                                                                   | Small ears, right ear overfolded                                                                                                                                                                                                                     |
| <b>Family History</b>                    | Daughter with same balanced translocation has normal phenotype                                                                                                                                                                         | Overfolded ear found in two other family members                                                                                                                                                                                                     |
| <hr/>                                    |                                                                                                                                                                                                                                        |                                                                                                                                                                                                                                                      |
|                                          | <b>Case 2F</b>                                                                                                                                                                                                                         | <b>Case 2G</b>                                                                                                                                                                                                                                       |
| <b>Age at Assessment</b>                 | 59 years                                                                                                                                                                                                                               | 58 years                                                                                                                                                                                                                                             |
| <b>Birth History</b>                     | Term                                                                                                                                                                                                                                   | Term                                                                                                                                                                                                                                                 |
| <b>Medical History</b>                   | Limited past medical history<br>No hospital admissions other than to treat numerous fractures, all due to horse riding accidents.<br>Single episode of “blackout” aged 21 years. Depression aged 58 years.<br>Partner ×11 miscarriages | Ear polyps diagnosed aged 5 years..<br>Road-traffic accident aged 19, causing multiple fractures.<br>Low sperm count; conceived after 10 years.<br>Deep vein thrombosis, secondary to trauma aged 40 years.                                          |
| <b>Developmental History</b>             | No data<br>Unable to read, poor writing skills, but academic achievement consistent for family                                                                                                                                         | No history of developmental delay<br>Mild dyslexia                                                                                                                                                                                                   |
| <b>Vision and Hearing</b>                | No hearing difficulties<br>Hypermetropia, recent onset. Previously no difficulties                                                                                                                                                     | Mild hearing impairment secondary to loud noise exposure<br>No visual difficulties                                                                                                                                                                   |
| <b>Height</b>                            | 162.5 cm                                                                                                                                                                                                                               | 188 cm                                                                                                                                                                                                                                               |
| <b>Percentile</b>                        | 0.4 <sup>th</sup> –2 <sup>nd</sup>                                                                                                                                                                                                     | 91 <sup>st</sup> –98 <sup>th</sup>                                                                                                                                                                                                                   |
| <b>Est. Height from Parental Heights</b> | 154 cm                                                                                                                                                                                                                                 | No data                                                                                                                                                                                                                                              |
| <b>Occipital-Frontal Circumference</b>   | 55 cm                                                                                                                                                                                                                                  | 59 cm                                                                                                                                                                                                                                                |
| <b>Percentile</b>                        | 9 <sup>th</sup>                                                                                                                                                                                                                        | 75 <sup>th</sup> –91 <sup>st</sup>                                                                                                                                                                                                                   |
| <b>General Examination</b>               | Unremarkable                                                                                                                                                                                                                           | Unremarkable                                                                                                                                                                                                                                         |
| <b>Neurological Examination</b>          | Normal tone, power and coordination in all four limbs                                                                                                                                                                                  | Normal tone, power and coordination in all four limbs                                                                                                                                                                                                |
| <b>Dysmorphic Features</b>               | None                                                                                                                                                                                                                                   | No dysmorphic facial features<br>Feet—low arches                                                                                                                                                                                                     |
| <b>Family History</b>                    | None                                                                                                                                                                                                                                   | Son with same translocation, with developmental delay and epilepsy                                                                                                                                                                                   |
| <hr/>                                    |                                                                                                                                                                                                                                        |                                                                                                                                                                                                                                                      |
|                                          | <b>Case 2H</b>                                                                                                                                                                                                                         | <b>Case 3A</b>                                                                                                                                                                                                                                       |
| <b>Age at Assessment</b>                 | 33 years                                                                                                                                                                                                                               | 41 years                                                                                                                                                                                                                                             |
| <b>Birth History</b>                     | Born at 39/40 weeks, 3.5 kg                                                                                                                                                                                                            | No data                                                                                                                                                                                                                                              |
| <b>Medical History</b>                   | No childhood medical problems<br>Left knee arthroscopy and trimming of cartilage.<br>Right knee recurrent bursitis                                                                                                                     | Asthma diagnosed aged 5 years.<br>Mild asthma only as an adult<br>Childhood eczema<br>×7 first trimester miscarriages, originally thought due to cervical incompetence<br>Breast Cancer, aged 37 years<br>Metastatic disease diagnosed aged 40 years |
| <b>Developmental History</b>             | No history of developmental delay<br>Academic achievement consistent for family                                                                                                                                                        | No history of developmental delay<br>Academic achievement consistent with family                                                                                                                                                                     |
| <b>Vision and Hearing</b>                | No hearing difficulties<br>Right amblyopia, under treated, subsequent poor vision in right eye                                                                                                                                         | No hearing difficulties<br>No visual difficulties                                                                                                                                                                                                    |
| <b>Height</b>                            | 185 cm                                                                                                                                                                                                                                 | 152.5 cm                                                                                                                                                                                                                                             |
| <b>Percentile</b>                        | 75 <sup>th</sup> –91 <sup>st</sup>                                                                                                                                                                                                     | 2 <sup>nd</sup> –9 <sup>th</sup>                                                                                                                                                                                                                     |

|                                          |                                                                                                                                               |                                                                                                                                        |
|------------------------------------------|-----------------------------------------------------------------------------------------------------------------------------------------------|----------------------------------------------------------------------------------------------------------------------------------------|
| <b>Est. Height from Parental Heights</b> | 174 cm                                                                                                                                        | 168 cm                                                                                                                                 |
| <b>Occipital-Frontal Circumference</b>   | 60.5 cm                                                                                                                                       | 54 cm                                                                                                                                  |
| <b>Percentile</b>                        | 91 <sup>st</sup> –98 <sup>th</sup>                                                                                                            | 9 <sup>th</sup> –25 <sup>th</sup>                                                                                                      |
| <b>General Examination</b>               | Raised body mass index                                                                                                                        | Cachetic                                                                                                                               |
| <b>Neurological Examination</b>          | Normal tone, power and coordination in all four limbs                                                                                         | Bradykinesia, consistent with terminal disease<br>No focal neurological signs                                                          |
| <b>Dysmorphic Features</b>               | High arched palate<br>No dysmorphic facial features<br>Feet—low arches                                                                        | None                                                                                                                                   |
| <b>Family History</b>                    | Two sons with Beckwith-Wiedemann syndrome, due to duplication of 11p                                                                          | None                                                                                                                                   |
|                                          | <b>Case 3B</b>                                                                                                                                | <b>Case 3C</b>                                                                                                                         |
| <b>Age at assessment</b>                 | 35 years                                                                                                                                      | 36 years                                                                                                                               |
| <b>Birth History</b>                     | Term                                                                                                                                          | No data                                                                                                                                |
| <b>Medical History</b>                   | No medical problems as a child<br>Breast reduction surgery, requiring repeat procedures<br>×2 miscarriages                                    | Recurrent chest infections as a child<br>Mild asthma<br>Heart murmur diagnosed in childhood; resolved spontaneously<br>×3 miscarriages |
| <b>Developmental History</b>             | No history of developmental delay                                                                                                             | No history of developmental delay<br>Speech and language mildly delayed<br>Academic achievement consistent for family                  |
| <b>Vision and Hearing</b>                | No hearing difficulties<br>No visual difficulties                                                                                             | No hearing difficulties<br>No visual difficulties                                                                                      |
| <b>Height</b>                            | 162.5 cm                                                                                                                                      | 162.5 cm                                                                                                                               |
| <b>Percentile</b>                        | 25 <sup>th</sup> –50 <sup>th</sup>                                                                                                            | 25 <sup>th</sup> –50 <sup>th</sup>                                                                                                     |
| <b>Est. Height from Parental Heights</b> | No data                                                                                                                                       | 164 cm                                                                                                                                 |
| <b>Occipital-Frontal Circumference</b>   | 56 cm                                                                                                                                         | 57 cm                                                                                                                                  |
| <b>Percentile</b>                        | 50 <sup>th</sup> –75 <sup>th</sup>                                                                                                            | 75 <sup>th</sup> –91 <sup>st</sup>                                                                                                     |
| <b>General Examination</b>               | Single café au lait patch on left aspect of neck                                                                                              | Area of freckling on right forearm, 2 cm × 3 cm                                                                                        |
| <b>Neurological Examination</b>          | High arched palate<br>Normal tone, power and coordination in all four limbs                                                                   | Normal tone, power and coordination in all four limbs                                                                                  |
| <b>Dysmorphic Features</b>               | None                                                                                                                                          | None                                                                                                                                   |
| <b>Family History</b>                    | Son with unbalanced translocation, multiple medical problems and global delay                                                                 | Daughter with developmental delay and epilepsy, normal karyotype, diagnosis: cerebral palsy                                            |
|                                          | <b>Case 3D</b>                                                                                                                                | <b>Case 3E</b>                                                                                                                         |
| <b>Age at Assessment</b>                 | 38 years                                                                                                                                      | 48 years                                                                                                                               |
| <b>Birth History</b>                     | Term                                                                                                                                          | No data                                                                                                                                |
| <b>Medical History</b>                   | Right orchidopexy aged 9 years<br>Renal stone aged 11 years, no underlying cause found<br>Ruptured left side prepatellar bursa aged 35 years. | Rheumatic fever aged 4 years<br>Tonsillectomy aged 5 years<br>Borderline hypertension                                                  |
| <b>Developmental History</b>             | No history of developmental delay<br>Academic achievement consistent for family                                                               | Walked aged 1 year<br>Talked “early”<br>Academic achievement consistent with family                                                    |
| <b>Vision and Hearing</b>                | No hearing difficulties<br>Right strabismus in infancy, corrected at 2 years                                                                  | No hearing difficulties<br>No visual difficulties                                                                                      |
| <b>Height</b>                            | 178 cm                                                                                                                                        | 162.5 cm                                                                                                                               |
| <b>Percentile</b>                        | 50 <sup>th</sup> –75 <sup>th</sup>                                                                                                            | 25 <sup>th</sup> –50 <sup>th</sup>                                                                                                     |
| <b>Est. Height from Parental Heights</b> | 176.5 cm                                                                                                                                      | 168 cm                                                                                                                                 |
| <b>Occipital-Frontal Circumference</b>   | 58 cm                                                                                                                                         | 57 cm                                                                                                                                  |

|                                          |                                                                                                    |                                                                                                                                                                                                                                                                                                     |
|------------------------------------------|----------------------------------------------------------------------------------------------------|-----------------------------------------------------------------------------------------------------------------------------------------------------------------------------------------------------------------------------------------------------------------------------------------------------|
| <b>Percentile</b>                        | 50 <sup>th</sup> –75 <sup>th</sup>                                                                 | 75 <sup>th</sup> –91 <sup>st</sup>                                                                                                                                                                                                                                                                  |
| <b>General Examination</b>               | Unremarkable                                                                                       | Unremarkable                                                                                                                                                                                                                                                                                        |
| <b>Neurological Examination</b>          | Normal tone and power<br>Mild dysdiadodyskinesia; lower limb coordination normal                   | Normal tone, power and coordination in all four limbs                                                                                                                                                                                                                                               |
| <b>Dysmorphic Features</b>               | Ears—prominent crus                                                                                | Feet—large for height, flat arches                                                                                                                                                                                                                                                                  |
| <b>Family History</b>                    | None                                                                                               | Daughter with unbalanced product of patient's translocation.<br>Mild Asperger syndrome, memory/concentration difficulties                                                                                                                                                                           |
| <hr/>                                    |                                                                                                    |                                                                                                                                                                                                                                                                                                     |
|                                          | <b>Case 3F</b>                                                                                     | <b>Case 3G</b>                                                                                                                                                                                                                                                                                      |
| <b>Age at Assessment</b>                 | 57 years                                                                                           | 41 years                                                                                                                                                                                                                                                                                            |
| <b>Birth History</b>                     | No data                                                                                            | No data                                                                                                                                                                                                                                                                                             |
| <b>Medical History</b>                   | No medical problems during childhood<br>×1 miscarriage<br>Umbilical hernia, repaired aged 55 years | Tonsillectomy aged 13 years<br>34 years: severe road traffic accident, involving fractured femur and wrist. Residual leg length discrepancy<br>Blackout during admission. Embolic episode?<br>Following dental work, has been commented that teeth are very dense<br>×4 miscarriages<br>Breast cyst |
| <b>Developmental History</b>             | No history of developmental delay<br>Academic achievement consistent for family                    | No history of developmental delay<br>Academic achievement consistent for family                                                                                                                                                                                                                     |
| <b>Vision and Hearing</b>                | Mild hearing loss, age related<br>Myopia, prescription –5, required glasses since 8 years          | No hearing difficulties<br>No visual difficulties                                                                                                                                                                                                                                                   |
| <b>Height</b>                            | 157.5 cm                                                                                           | 160 cm                                                                                                                                                                                                                                                                                              |
| <b>Percentile</b>                        | 9 <sup>th</sup> –25 <sup>th</sup>                                                                  | 25 <sup>th</sup> –50 <sup>th</sup>                                                                                                                                                                                                                                                                  |
| <b>Est. Height from Parental Heights</b> | 160 cm                                                                                             | 161.5 cm                                                                                                                                                                                                                                                                                            |
| <b>Occipital-Frontal Circumference</b>   | 56.5 cm                                                                                            | 55.2 cm                                                                                                                                                                                                                                                                                             |
| <b>Percentile</b>                        | 75 <sup>th</sup> –91 <sup>st</sup>                                                                 | 25 <sup>th</sup> –50 <sup>th</sup>                                                                                                                                                                                                                                                                  |
| <b>General Examination</b>               | Unremarkable                                                                                       | Small strawberry naevus on breast                                                                                                                                                                                                                                                                   |
| <b>Neurological Examination</b>          | Normal tone, power and coordination in all four limbs                                              | Normal tone, power and coordination in all four limbs                                                                                                                                                                                                                                               |
| <b>Dysmorphic Features</b>               | None                                                                                               | Ears—large upper part of pinnae, small ear lobes, normally rotated<br>Feet—flat arches                                                                                                                                                                                                              |
| <b>Family History</b>                    | None                                                                                               | Son has normal phenotype and same balanced translocation                                                                                                                                                                                                                                            |

Table S2. Phenotypic Details of the 14 Clinically Affected Patients

|                              | <b>Case 16</b>                                                                                                                                                                                                                                                        | <b>Case 20</b>                                                                                                                                                                     |
|------------------------------|-----------------------------------------------------------------------------------------------------------------------------------------------------------------------------------------------------------------------------------------------------------------------|------------------------------------------------------------------------------------------------------------------------------------------------------------------------------------|
| <b>Age at Assessment</b>     | 34 years                                                                                                                                                                                                                                                              | 32 years                                                                                                                                                                           |
| <b>Birth History</b>         | Term. Born in good condition                                                                                                                                                                                                                                          | 38/40. Birth weight 2.18 kg. 2 <sup>nd</sup> percentile                                                                                                                            |
| <b>Medical History</b>       | Absence seizures from 4 years. Age 6 years grand mal seizures, diagnosed as temporal lobe epilepsy<br>Psychiatric history, beginning at 11 years. Obsessional behaviour and anxiety requiring prolonged psychiatric admission<br>Obesity, treated with gastric bypass | Quiet and hypotonic from birth<br>Ventilated for 1/7, required nasogastric feeds for 4/7.<br>Remained hypotonic until ambulant. Menorrhagia.<br>Migraines throughout teenage years |
| <b>Developmental History</b> | Sat at 6 months, walked at 18 months.<br>Speech development normal.<br>No concerns until age 11 years.<br>Adult IQ 74                                                                                                                                                 | Sat at 6 months, walked at 14 months.<br>Speech development slow, main difficulty with understanding.<br>Attended mainstream school with support                                   |
| <b>Vision and Hearing</b>    | Mild hearing impairment. No visual difficulties                                                                                                                                                                                                                       | No hearing difficulties. Amblyopia                                                                                                                                                 |

|                                          |                                                                                                                              |                                                                                                                                |
|------------------------------------------|------------------------------------------------------------------------------------------------------------------------------|--------------------------------------------------------------------------------------------------------------------------------|
| <b>Height</b>                            | 162.5 cm                                                                                                                     | 157.5 cm                                                                                                                       |
| <b>Percentile</b>                        | 25 <sup>th</sup> –50 <sup>th</sup>                                                                                           | 9 <sup>th</sup> –25 <sup>th</sup>                                                                                              |
| <b>Est. Height from Parental Heights</b> | 158 cm                                                                                                                       | 158 cm                                                                                                                         |
| <b>Occipital-Frontal Circumference</b>   | 58 cm                                                                                                                        | 55 cm                                                                                                                          |
| <b>Percentile</b>                        | 98 <sup>th</sup>                                                                                                             | 25 <sup>th</sup> –50 <sup>th</sup>                                                                                             |
| <b>General Examination</b>               | Flat affect with monotonal voice, high body mass index                                                                       | Slow, slightly slurred speech. Quiet, shy                                                                                      |
| <b>Neurological Examination</b>          | Bradykinesia.<br>Normal tone and power in all four limbs<br>Poor coordination and heel-to-toe walk.<br>Normal eye movements. | Normal tone and power in all four limbs.<br>Poor coordination.<br>Unable to heel-to-toe walk.<br>Poor upper limb coordination. |
| <b>Dysmorphic Features</b>               | Downslanting palpebral fissures                                                                                              | Coarse facial features.<br>Dark, curly hair.<br>Single palmar crease on left hand                                              |
| <b>Family History</b>                    | Brother with temporal lobe epilepsy and normal karyotype                                                                     | Sister with anorexia nervosa                                                                                                   |

|                                          | <b>Case 43</b>              | <b>Case 45</b>                                                                                                                                                                                                                                        |
|------------------------------------------|-----------------------------|-------------------------------------------------------------------------------------------------------------------------------------------------------------------------------------------------------------------------------------------------------|
| <b>Age at Assessment</b>                 | 3 months                    | 32 years                                                                                                                                                                                                                                              |
| <b>Birth History</b>                     | No data                     | No data                                                                                                                                                                                                                                               |
| <b>Medical History</b>                   | Isolated truncus arteriosus | No medical problems as a child.<br>Menarche aged 12 years. Menses initially erratic and then regular.<br>Amenorrhoea from age 31 years. No hot flushes or other menopausal symptoms.<br>Gonadotrophin levels high consistent with premature menopause |
| <b>Developmental History</b>             | Normal development          | No delay known in early milestones.<br>Attended mainstream school                                                                                                                                                                                     |
| <b>Vision and Hearing</b>                | No data                     | No data                                                                                                                                                                                                                                               |
| <b>Height</b>                            | No data                     | 157 cm                                                                                                                                                                                                                                                |
| <b>Percentile</b>                        | No data                     | 9 <sup>th</sup> –25 <sup>th</sup>                                                                                                                                                                                                                     |
| <b>Est. Height from Parental Heights</b> | No data                     | No data                                                                                                                                                                                                                                               |
| <b>Occipital-Frontal Circumference</b>   | No data                     | No data                                                                                                                                                                                                                                               |
| <b>Percentile</b>                        | No data                     | No data                                                                                                                                                                                                                                               |
| <b>General Examination</b>               | No data                     | Unremarkable                                                                                                                                                                                                                                          |
| <b>Neurological Examination</b>          | No data                     | Neurology grossly intact                                                                                                                                                                                                                              |
| <b>Dysmorphic Features</b>               | None                        | None                                                                                                                                                                                                                                                  |
| <b>Family History</b>                    | No data                     | No data                                                                                                                                                                                                                                               |
|                                          | <b>Case 48</b>              | <b>Case 49</b>                                                                                                                                                                                                                                        |
| <b>Age at Assessment</b>                 | 15 years                    | 21 years                                                                                                                                                                                                                                              |
| <b>Birth History</b>                     | No data                     | No data                                                                                                                                                                                                                                               |
| <b>Medical History</b>                   | No data                     | Isolated cleft palate repaired at 6 months.<br>Two operations for scoliosis                                                                                                                                                                           |
| <b>Developmental History</b>             | Severe developmental delay  | No speech, but good communication with British sign language                                                                                                                                                                                          |
| <b>Vision and Hearing</b>                | No data                     | No data<br>No data                                                                                                                                                                                                                                    |

|                                          |            |                                                                                                                                                                               |
|------------------------------------------|------------|-------------------------------------------------------------------------------------------------------------------------------------------------------------------------------|
| <b>Height</b>                            | No data    | No data                                                                                                                                                                       |
| <b>Percentile</b>                        | No data    | No data                                                                                                                                                                       |
| <b>Est. Height from Parental Heights</b> | No data    | No data                                                                                                                                                                       |
| <b>Occipital-Frontal Circumference</b>   | No data    | No data                                                                                                                                                                       |
| <b>Percentile</b>                        | No data    | No data                                                                                                                                                                       |
| <b>General Examination</b>               | No data    | Very sociable but with significant behavioural abnormalities                                                                                                                  |
| <b>Neurological Examination</b>          | No data    | No data                                                                                                                                                                       |
| <b>Dysmorphic Features</b>               | Dysmorphic | Long thin fingers with hypoplastic distal phalanges.<br>Long face with a pointed chin and a high anterior hairline with a cowlick.<br>Coarse features, including a long nose. |
| <b>Family History</b>                    | No data    | No data                                                                                                                                                                       |

---

|                                          | <b>Case 50</b>                                                                                                                                                                                                   | <b>Case 51</b>                                                                                                                                                                                                    |
|------------------------------------------|------------------------------------------------------------------------------------------------------------------------------------------------------------------------------------------------------------------|-------------------------------------------------------------------------------------------------------------------------------------------------------------------------------------------------------------------|
| <b>Age at Assessment</b>                 | 30 years                                                                                                                                                                                                         | 6 years                                                                                                                                                                                                           |
| <b>Birth History</b>                     | No data                                                                                                                                                                                                          | Term. 2.86 kg Feeding difficulties, wouldn't breastfeed                                                                                                                                                           |
| <b>Medical History</b>                   | Menarche aged 14 years. Menses at one year intervals.<br>Aged 19 years took combined oral contraceptive pill for 9 years; on discontinuation, no resumption of menstruation, associated with high gonadotrophins | Autistic Spectrum Disorder and Attention Deficit Hyperactivity Disorder aged 6 years<br>Sleeps poorly, requiring melatonin<br>Shows mannerisms and repetitive behaviours, self injurious behaviour<br>No seizures |
| <b>Developmental History</b>             | No delay known in early milestones                                                                                                                                                                               | Rolled at 1 year, sat at approximately 1 year, walked at 19 months<br>No language until 4 years<br>Severe language delay<br>Attends special needs school                                                          |
| <b>Vision and Hearing</b>                | No hearing difficulties<br>No visual difficulties                                                                                                                                                                | No hearing difficulties<br>No visual difficulties                                                                                                                                                                 |
| <b>Height</b>                            | 166 cm                                                                                                                                                                                                           | 131.6 cm                                                                                                                                                                                                          |
| <b>Percentile</b>                        | 50 <sup>th</sup> -75 <sup>th</sup>                                                                                                                                                                               | 75 <sup>th</sup> -91 <sup>st</sup>                                                                                                                                                                                |
| <b>Est. Height from Parental Heights</b> | 159 cm                                                                                                                                                                                                           | Tall for family                                                                                                                                                                                                   |
| <b>Occipital-Frontal Circumference</b>   | 56 cm                                                                                                                                                                                                            | 50.5 cm                                                                                                                                                                                                           |
| <b>Centile</b>                           | 50 <sup>th</sup> -75 <sup>th</sup>                                                                                                                                                                               | 2 <sup>nd</sup>                                                                                                                                                                                                   |
| <b>General Examination</b>               | Slight build, long fingers                                                                                                                                                                                       | Tall stature<br>1 café au lait patch on left back                                                                                                                                                                 |
| <b>Neurological Examination</b>          | Neurology grossly normal                                                                                                                                                                                         | Neurology grossly normal                                                                                                                                                                                          |
| <b>Dysmorphic Features</b>               | No dysmorphic features                                                                                                                                                                                           | Large, upslanting eyes<br>Well defined philtrum<br>Mild fifth finger clinodactyly                                                                                                                                 |
| <b>Family History</b>                    | Mother had very irregular menses, menarche at 15 years, menopause at 50 years, normal karyotype                                                                                                                  | Brother with 47XYY in 90% of cells and marker chromosome 22                                                                                                                                                       |

---

|                          | <b>Case 52</b>                                                                                                                        | <b>Case 53</b>                                                                                                                                                                         |
|--------------------------|---------------------------------------------------------------------------------------------------------------------------------------|----------------------------------------------------------------------------------------------------------------------------------------------------------------------------------------|
| <b>Age at Assessment</b> | 13 years                                                                                                                              | 7 years                                                                                                                                                                                |
| <b>Birth History</b>     | No data                                                                                                                               | 41/40. 3.83 kg. Born in good condition                                                                                                                                                 |
| <b>Medical History</b>   | Respiratory problems and vocal cord palsy, which required tracheostomy.<br>Scoliosis (60%) required surgery.<br>Learning difficulties | Failed to fix with eyes at 3/12<br>8/12 hypotonia identified.<br>Episode of loss of use of left upper and lower limbs, aged 3 years. CT scan normal, recovery made but slight weakness |

|                                          |                                       |                                                                                                                                          |
|------------------------------------------|---------------------------------------|------------------------------------------------------------------------------------------------------------------------------------------|
|                                          | Normal growth rate.<br>Short stature. | remained.<br>Seizure at 8/12<br>Febrile fit?<br>Initial MRI brain—delayed myelination. Repeat scan aged 6 years, complete myelination    |
| <b>Developmental History</b>             | Delayed speech                        | Smiled at 6 weeks, rolled at 6 months, sat at 18 months.<br>Able to walk with support.<br>No speech, understands limited number of words |
| <b>Vision and Hearing</b>                | No data                               | Hearing “excellent”<br>Hyperacusis?<br>Left strabismus                                                                                   |
| <b>Height</b>                            | No data                               | No data                                                                                                                                  |
| <b>Percentile</b>                        | No data                               | No data                                                                                                                                  |
| <b>Est. Height from Parental Heights</b> | No data                               | No data                                                                                                                                  |
| <b>Occipital-Frontal Circumference</b>   | No data                               | 52 cm                                                                                                                                    |
| <b>Percentile</b>                        | 2 <sup>nd</sup>                       | 25 <sup>th</sup>                                                                                                                         |
| <b>General Examination</b>               | Asymmetry more marked in the feet     | Left strabismus, quiet                                                                                                                   |
| <b>Neurological Examination</b>          | No data                               | Hypotonic, spontaneous movements of all four limbs.<br>Deep tendon reflexes present, plantars downgoing                                  |
| <b>Dysmorphic Features</b>               | Slight facial dysmorphism             | No dysmorphic facial features<br>Slender fingers                                                                                         |
| <b>Family History</b>                    | No data                               | No data                                                                                                                                  |

|                                          | Case 54                                                                                                                                                                                                                                                              | Case 55                                                                                                                                                                                                  |
|------------------------------------------|----------------------------------------------------------------------------------------------------------------------------------------------------------------------------------------------------------------------------------------------------------------------|----------------------------------------------------------------------------------------------------------------------------------------------------------------------------------------------------------|
| <b>Age at Assessment</b>                 | 11 years                                                                                                                                                                                                                                                             | 42 years                                                                                                                                                                                                 |
| <b>Birth History</b>                     | Term. 3.8 kg. Born in good condition                                                                                                                                                                                                                                 | No data                                                                                                                                                                                                  |
| <b>Medical History</b>                   | Coarctation of aorta diagnosed at 8 weeks. Associated with cardiomegaly, pneumothorax, and pneumonia ×2 further pneumothoraces in 1st year. Repeated chest infections.<br>Undescended testes, orchidopexy at 3 years. Behavioural difficulties, on autistic spectrum | No childhood medical problems<br>Allergies, including hayfever<br>Gastro-oesophageal reflux, diet controlled<br>Gum disease and poor dentition<br>Low sperm count<br>Partner had “multiple” miscarriages |
| <b>Developmental History</b>             | Obsessional tendencies but very sociable.<br>Hypercholesterolaemia, diet controlled.<br>Smiled at 10 weeks, sat at 9 months, walked at 17 months.<br>Speech delay.<br>Attends mainstream school, mild learning difficulties                                          | No known delay in early milestones<br>Attended mainstream school<br>Academic achievement consistent with family                                                                                          |
| <b>Vision and Hearing</b>                | No hearing difficulties<br>Left strabismus, corrected at 5 years                                                                                                                                                                                                     | No hearing difficulties<br>No visual difficulties                                                                                                                                                        |
| <b>Height</b>                            | No data                                                                                                                                                                                                                                                              | 175 cm                                                                                                                                                                                                   |
| <b>Percentile</b>                        | No data                                                                                                                                                                                                                                                              | 25 <sup>th</sup> –50 <sup>th</sup>                                                                                                                                                                       |
| <b>Est. Height from Parental Heights</b> | Tall for family                                                                                                                                                                                                                                                      | 176 cm                                                                                                                                                                                                   |
| <b>Occipital-Frontal Circumference</b>   | 57 cm                                                                                                                                                                                                                                                                | 60.5 cm                                                                                                                                                                                                  |
| <b>Percentile</b>                        | 98 <sup>th</sup> –99.6 <sup>th</sup>                                                                                                                                                                                                                                 | 91 <sup>st</sup> –98 <sup>th</sup><br>(Brother also has a large head)                                                                                                                                    |
| <b>General Examination</b>               | Tall stature<br>Left strabismus                                                                                                                                                                                                                                      | Obese                                                                                                                                                                                                    |
| <b>Neurological Examination</b>          | Normal tone and power in all four limbs<br>Mild ataxia demonstrated by reduced ability to heel-to-toe walk                                                                                                                                                           | Normal, tone power and coordination in all four limbs. High palate                                                                                                                                       |
| <b>Dysmorphic Features</b>               | Ears—large ear lobes, flat pinnae<br>Hands—brachydactyly, mild joint hypermobility<br>Feet—wide with short toes, low arches<br>Pectus excavatum                                                                                                                      | Hypertelorism<br>Long, slim fingers                                                                                                                                                                      |



**Family History**                      Father has hypercholesterolaemia                      No data

|                                          | <b>Case 56</b>                                                                                                                                              | <b>Case 57</b>                                                                                                                                                                                                                                               |
|------------------------------------------|-------------------------------------------------------------------------------------------------------------------------------------------------------------|--------------------------------------------------------------------------------------------------------------------------------------------------------------------------------------------------------------------------------------------------------------|
| <b>Age at Assessment</b>                 | 39 years                                                                                                                                                    | 43 years                                                                                                                                                                                                                                                     |
| <b>Birth History</b>                     | No data                                                                                                                                                     | 41/40. Birth weight 2.55 kg. 2 <sup>nd</sup> percentile.<br>Quiet on delivery, required nasogastric feeding for 3 weeks                                                                                                                                      |
| <b>Medical History</b>                   | No childhood medical problems<br>Infertility, with very low sperm count, mainly immotile                                                                    | Epilepsy diagnosed at 2 years, grand mal seizures. Had a seizure every few months during childhood. No episodes of status epilepticus.<br>Hypertension, diagnosed at 40 years.<br>Hypercholesterolaemia.<br>Joint laxity, knee dislocation requiring surgery |
| <b>Developmental History</b>             | No known delay in early milestones<br>Academic achievement consistent with family<br>Difficulties in visuo-spatial assessment; for example, unable to drive | Sat at around 8 months, walked at 16 months.<br>Speech development normal.<br>Attended mainstream school.<br>Paid unskilled employment, lives independently.<br>Academic achievement less than unaffected family members                                     |
| <b>Vision and Hearing</b>                | No hearing difficulties<br>No visual difficulties                                                                                                           | No hearing difficulties. No visual difficulties                                                                                                                                                                                                              |
| <b>Height</b>                            | 180 cm                                                                                                                                                      | 160 cm                                                                                                                                                                                                                                                       |
| <b>Percentile</b>                        | 50 <sup>th</sup> –75 <sup>th</sup>                                                                                                                          | 0.4 <sup>th</sup> –2 <sup>nd</sup>                                                                                                                                                                                                                           |
| <b>Est. Height from Parental Heights</b> | 178 cm                                                                                                                                                      | 171.5 cm                                                                                                                                                                                                                                                     |
| <b>Occipital-Frontal Circumference</b>   | 57.5 cm                                                                                                                                                     | No data                                                                                                                                                                                                                                                      |
| <b>Percentile</b>                        | 50 <sup>th</sup> –75 <sup>th</sup>                                                                                                                          | No data                                                                                                                                                                                                                                                      |
| <b>General Examination</b>               |                                                                                                                                                             | Speech slow but not dysarthric.<br>Normal palate<br>Dental crowding                                                                                                                                                                                          |
| <b>Neurological Examination</b>          | Normal tone, power and co-ordination in all four limbs                                                                                                      | Normal tone and power in all four limbs.<br>Poor co-ordination of upper and lower limbs.<br>Unsteady gait, unable to heel-toe walk.<br>Normal eye movements                                                                                                  |
| <b>Dysmorphic Features</b>               | No dysmorphic facial features. Feet- very flat arches.<br>Pectus carinatum                                                                                  | No dysmorphic facial features                                                                                                                                                                                                                                |
| <b>Family History</b>                    | No data                                                                                                                                                     | Brother with normal karyotype and intrauterine growth retardation, stellate cataract strabismus, short stature, learning difficulties and depression. No facial dysmorphic features                                                                          |

**Table S3. Genes Mapped to the Deleted Regions in Cases 20, 57, 52, and 53**

| Case | Chromosome | Gene Symbol    | Gene Name                                                                      |
|------|------------|----------------|--------------------------------------------------------------------------------|
| 20   | 5q12.1     | <i>KIF2A</i>   | kinesin heavy chain member 2A                                                  |
| 20   | 5q12.1     | <i>DIMT1L</i>  | DIM1 dimethyladenosine transferase 1-like ( <i>S. cerevisiae</i> )             |
| 20   | 5q12.1     | <i>IPO11</i>   | importin 11                                                                    |
| 20   | 5q12.1     | <i>ISCA1L</i>  | iron-sulfur cluster assembly 1 homolog ( <i>S. cerevisiae</i> )-like           |
| 20   | 5q12.1     | <i>HTR1A</i>   | 5-hydroxytryptamine (serotonin) receptor 1A                                    |
| 20   | 5q12.1     | <i>RNF180</i>  | RING finger protein 180                                                        |
| 52   | 4q13.3     | <i>SLC4A4</i>  | solute carrier family 4, sodium bicarbonate cotransporter, member 4            |
| 52   | 4q13.3     | <i>GC</i>      | group-specific component (vitamin D binding protein)                           |
| 52   | 4q13.3     | <i>NPFFR2</i>  | neuropeptide FF receptor 2                                                     |
| 52   | 4q13.3     | <i>ADAMTS3</i> | metallopeptidase with thrombospondin type 1 motif, 3                           |
| 52   | 4q13.3     | <i>COX18</i>   | cytochrome c oxidase assembly homolog ( <i>S. cerevisiae</i> )                 |
| 52   | 4q13.3     | <i>ANKRD17</i> | ankyrin repeat domain 17                                                       |
| 53   | 4q13.3     | <i>PF4V</i>    | platelet factor 4 variant 1                                                    |
| 53   | 4q13.3     | <i>CXCL1</i>   | chemokine (C-X-C motif) ligand 1 (melanoma growth stimulating activity, alpha) |
| 53   | 4q13.3     | <i>PF4</i>     | platelet factor 4 (chemokine (C-X-C motif) ligand 4)                           |
| 53   | 4q13.3     | <i>PPBP</i>    | pro-platelet basic protein (chemokine (C-X-C motif) ligand 7)                  |
| 53   | 4q13.3     | <i>CXCL5</i>   | chemokine (C-X-C motif) ligand 5                                               |
| 53   | 4q13.3     | <i>CXCL3</i>   | chemokine (C-X-C motif) ligand 3                                               |
| 53   | 4q13.3     | <i>PPBPL2</i>  | pro-platelet basic protein-like 2                                              |
| 53   | 4q13.3     | <i>CXCL2</i>   | chemokine (C-X-C motif) ligand 2                                               |
| 53   | 4q13.3     | <i>MTHFD2L</i> | methylenetetrahydrofolate dehydrogenase (NADP+ dependent) 2-like               |
| 53   | 4q13.3     | <i>EPGN</i>    | epithelial mitogen homolog (mouse)                                             |
| 53   | 4q13.3     | <i>EREG</i>    | epiregulin                                                                     |
| 53   | 4q13.3     | <i>AREG</i>    | amphiregulin (schwannoma-derived growth factor)                                |
| 53   | 4q13.3     | <i>BTC</i>     | betacellulin                                                                   |
| 53   | 4q13.3     | <i>PARM1</i>   | Protein PARM-1 precursor.                                                      |
| 53   | 4q13.3     | <i>RCHY1</i>   | ring finger and CHY zinc finger domain containing 1                            |
| 53   | 4q13.3     | <i>THAP6</i>   | THAP domain containing 6                                                       |
| 53   | 4q13.3     | <i>CDKL2</i>   | cyclin-dependent kinase-like 2 (CDC2-related kinase)                           |
| 53   | 4q13.3     | <i>G3BP2</i>   | GTPase activating protein (SH3 domain) binding protein 2                       |
| 53   | 4q13.3     | <i>USO1</i>    | USO1 homolog, vesicle docking protein (yeast)                                  |
| 53   | 4q13.3     | <i>PPEF2</i>   | protein phosphatase, EF-hand calcium binding domain 2                          |
| 53   | 4q13.3     | <i>ASAHL</i>   | N-acylsphingosine amidohydrolase (acid ceramidase)-like                        |
| 57   | 4q32.1     | <i>MAP9</i>    | microtubule-associated protein 9                                               |
| 57   | 4q32.1     | <i>GUCY1A3</i> | guanylate cyclase 1, soluble, alpha 3                                          |
| 57   | 4q32.1     | <i>GUCY1B3</i> | guanylate cyclase 1, soluble, beta 3                                           |
| 57   | 4q32.1     | <i>ACCN5</i>   | amiloride-sensitive cation channel 5, intestinal                               |
| 57   | 4q32.1     | <i>TDO2</i>    | tryptophan 2,3-dioxygenase                                                     |
| 57   | 4q32.1     | <i>CTSO</i>    | cathepsin O                                                                    |
| 57   | 4q32.1     | <i>PDGFC</i>   | platelet derived growth factor C                                               |
| 57   | 4q32.1     | <i>GLRB</i>    | glycine receptor, beta                                                         |
| 57   | 4q32.1     | <i>GRIA2</i>   | glutamate receptor, ionotropic, AMPA 2                                         |
